# Supplementary material for: Physical Activity as a Treatment for Cancer-Related Fatigue in Children, Adolescents and Young Adults: A Systematic Review
Source: MDPI journal article supplement (doi:10.3390/children10030572), 2023-03-17
Supplement: s1 [file s1]

## S1: Search strategy

Search strategy in PubMed (MEDLINE)

("fatiguability"[All Fields] OR "fatiguable"[All Fields] OR "fatigue"[MeSH Terms] OR "fatigue"[All Fields] OR "fatigued"[All Fields] OR "fatigues"[All Fields] OR "fatiguing"[All Fields] OR "fatigueability"[All Fields]) AND (((("paediatrics"[All Fields] OR "pediatrics"[MeSH Terms] OR "pediatrics"[All Fields] OR "paediatric"[All Fields] OR "pediatric"[All Fields]) AND ("neoplasms"[MeSH Terms] OR "neoplasms"[All Fields] OR "oncology"[All Fields] OR "oncology s"[All Fields])) OR ((("child"[MeSH Terms] OR "child"[All Fields] OR "children"[All Fields] OR "child s"[All Fields] OR "children s"[All Fields] OR "childrens"[All Fields] OR "childs"[All Fields]) AND ("neoplasms"[MeSH Terms] OR "neoplasms"[All Fields] OR "oncology"[All Fields] OR "oncology s"[All Fields])) OR ((("adolescences"[All Fields] OR "adolescence"[All Fields] OR "adolescent"[MeSH Terms] OR "adolescent"[All Fields] OR "adolescence"[All Fields] OR "adolescents"[All Fields] OR "adolescent s"[All Fields]) AND ("neoplasms"[MeSH Terms] OR "neoplasms"[All Fields] OR "oncology"[All Fields] OR "oncology s"[All Fields])))) AND (((("exercise"[MeSH Terms] OR "exercise"[All Fields] OR "exercises"[All Fields] OR "exercise therapy"[MeSH Terms] OR ("exercise"[All Fields] AND "therapy"[All Fields]) OR "exercise therapy"[All Fields] OR "exercise s"[All Fields] OR "exercised"[All Fields] OR "exerciser"[All Fields] OR "exercisers"[All Fields] OR "exercising"[All Fields]) AND ("neoplasms"[MeSH Terms] OR "neoplasms"[All Fields] OR "oncology"[All Fields] OR "oncology s"[All Fields])) OR ((("sport s"[All Fields] OR "sports"[MeSH Terms] OR "sports"[All Fields] OR "sport"[All Fields] OR "sporting"[All Fields]) AND ("neoplasms"[MeSH Terms] OR "neoplasms"[All Fields] OR "oncology"[All Fields] OR "oncology s"[All Fields]))))

## Search strategy in SPORTDiscus (EBSCO)

(fatigue) AND (pediatric oncology OR child oncology OR adolescent oncology) AND (exercise oncology OR sport oncology)

Interface - EBSCOhost Research Databases

Search Screen - Advanced Search

Database - RILM Music Encyclopedias; America: History & Life; American Antiquarian Society (AAS) Historical Periodicals Collection: Series 3; American Antiquarian Society (AAS) Historical Periodicals Collection: Series 1; American Antiquarian Society (AAS) Historical Periodicals Collection: Series 2; American Antiquarian Society (AAS) Historical Periodicals Collection: Series 4; American Antiquarian Society (AAS) Historical Periodicals Collection: Series 5; Open Dissertations; Business Source Premier; Communication Abstracts; eBook Collection (EBSCOhost); EconLit; GeoRef; GeoRef In Process; GreenFILE; Historical Abstracts; Index Islamicus; Index to Legal Periodicals and Books (H.W. Wilson); Library, Information Science & Technology Abstracts; MLA Directory of Periodicals; MLA International Bibliography; Philosopher's Index; PSYINDEX Literature with PSYINDEX Tests; Regional Business News; The Nation Archive (DFG); The New Republic Archive (DFG); RIPM - Retrospective Index to Music Periodicals; CINAHL Complete; APA PsycArticles; MEDLINE; APA PsycInfo; RILM Abstracts of Music Literature; eBook Subscription Psychology Collection (Trial); eBook Open Access (OA) Collection (EBSCOhost)

Expanders - Apply related words; Also search within the full text of the articles

Search modes - Boolean/Phrase
