# Supplementary material for: Physical Activity as a Treatment for Cancer-Related Fatigue in Children, Adolescents and Young Adults: A Systematic Review
Source: MDPI journal article supplement (doi:10.3390/children10030572), 2023-03-17
Supplement: s1 [file s1]

### S3: Methodological quality assessment of the included studies

Table S3.1: Methodological quality assessment of the included randomised controlled trials.

| <b>Autor (Jahr)</b>    | <b>Item</b> | <b>Bewertung</b>                                                                                             |
|------------------------|-------------|--------------------------------------------------------------------------------------------------------------|
| Atkinson et al. (2021) | 1.          | Block randomisation with stratification factors                                                              |
|                        | 2.          | Concealed by opaque envelopes                                                                                |
|                        | 3.          | No significant differences in baseline characteristics                                                       |
|                        | 4.          | No information about blinding of participants                                                                |
|                        | 5.          | No information about blinding of instructors                                                                 |
|                        | 6.          | Outcome assessors were blinded                                                                               |
|                        | 7.          | No information about distribution of different treatments in groups                                          |
|                        | 8.          | More drop-outs in control arm; no description of impact                                                      |
|                        | 9.          | No information about ITT-analysis                                                                            |
|                        | 10.         | Same measurements for all participants                                                                       |
|                        | 11.         | Reliability of measurements is given                                                                         |
|                        | 12.         | Linear mixed-effects model was performed; power calculation results were not respected; assumptions were met |
|                        | 13.         | Multicenter, parallel group randomized controlled trial                                                      |
| Bhatt et al. (2013)    | 1.          | Randomisation using sealed envelope method                                                                   |
|                        | 2.          | Concealed by opaque envelopes                                                                                |
|                        | 3.          | No information about differences at baseline                                                                 |
|                        | 4.          | No information about blinding of participants                                                                |
|                        | 5.          | No information about blinding of instructors                                                                 |
|                        | 6.          | No information about blinding of outcome assessors                                                           |
|                        | 7.          | Different treatments in groups (IG 1: Aerobic exercise; IG 2: Relaxation techniques)                         |
|                        | 8.          | No information about drop-outs and missing data                                                              |
|                        | 9.          | No information about ITT-analysis                                                                            |
|                        | 10.         | Same measurements for all participants                                                                       |
|                        | 11.         | Reliability of measurements is given                                                                         |
|                        | 12.         | Parametric tests were performed; no information about power calculation or assumption checks                 |
|                        | 13.         | Parallel group randomized controlled trial                                                                   |
| Hamari et al. (2019)   | 1.          | Computer-generated list based on block randomisation                                                         |
|                        | 2.          | No information about concealment                                                                             |
|                        | 3.          | All characteristics seem to be comparable                                                                    |
|                        | 4.          | Participants were blinded                                                                                    |
|                        | 5.          | Physical therapists were blinded                                                                             |
|                        | 6.          | Outcome assessors were not blinded                                                                           |
|                        | 7.          | No different treatments in groups                                                                            |
|                        | 8.          | Comparable number of drop-outs in control arm; reasons for drop-outs are given                               |
|                        | 9.          | Missing data wasn't reported correctly                                                                       |
|                        | 10.         | Same measurements for all participants                                                                       |
|                        | 11.         | Incomplete information about reliability of measurements                                                     |
|                        | 12.         | Non-parametric tests were performed; power calculation results and assumptions were met                      |
|                        | 13.         |                                                                                                              |

| Parallel group randomized controlled trial with follow-up |     |                                                                                                                       |
|-----------------------------------------------------------|-----|-----------------------------------------------------------------------------------------------------------------------|
| Hinds et al. (2007)                                       | 1.  | Computer-generated randomisation with stratification factors                                                          |
|                                                           | 2.  | No information about concealment                                                                                      |
|                                                           | 3.  | No significant differences in baseline characteristics                                                                |
|                                                           | 4.  | Participants were not blinded                                                                                         |
|                                                           | 5.  | Instructors were not blinded                                                                                          |
|                                                           | 6.  | Outcome assessors were not blinded                                                                                    |
|                                                           | 7.  | No information about different treatments in groups                                                                   |
|                                                           | 8.  | Incomplete information about missing data and drop-outs                                                               |
|                                                           | 9.  | ITT-analysis was performed                                                                                            |
|                                                           | 10. | Same measurements for all participants                                                                                |
|                                                           | 11. | Reliability of measurements is given                                                                                  |
|                                                           | 12. | Parametric and nonparametric tests were performed; power calculation results were not respected; assumptions were met |
|                                                           | 13. | Randomized, prospective, two-site and two-group pilot study                                                           |
| Lam et al. (2018)                                         | 1.  | Computer-generated randomisation                                                                                      |
|                                                           | 2.  | Concealed by opaque envelopes                                                                                         |
|                                                           | 3.  | No significant differences in baseline characteristics                                                                |
|                                                           | 4.  | Participants were not blinded                                                                                         |
|                                                           | 5.  | Instructors were not blinded                                                                                          |
|                                                           | 6.  | Outcome assessors were blinded                                                                                        |
|                                                           | 7.  | Placebo intervention activities                                                                                       |
|                                                           | 8.  | Comparable number of drop-outs in control arm; reasons for drop-outs are given                                        |
|                                                           | 9.  | ITT-analysis was performed                                                                                            |
|                                                           | 10. | Same measurements for all participants                                                                                |
|                                                           | 11. | Incomplete information about reliability of measurements                                                              |
|                                                           | 12. | Parametric and nonparametric tests were performed; power calculation results were respected                           |
|                                                           | 13. | Two-group pre-test and repeated post-test between-subject design                                                      |
| Stössel et al. (2020)                                     | 1.  | Computer-generated randomisation with stratification factors                                                          |
|                                                           | 2.  | Concealed randomisation with RITA software                                                                            |
|                                                           | 3.  | No significant differences in baseline characteristics                                                                |
|                                                           | 4.  | Participants were not blinded                                                                                         |
|                                                           | 5.  | Instructors were not blinded                                                                                          |
|                                                           | 6.  | Outcome assessors were not blinded                                                                                    |
|                                                           | 7.  | Comparable treatments                                                                                                 |
|                                                           | 8.  | Comparable number of drop-outs in control arm; reasons for drop-outs are given                                        |
|                                                           | 9.  | ITT-analysis was performed                                                                                            |
|                                                           | 10. | Same measurements for all participants                                                                                |
|                                                           | 11. | Reliability of measurements is given                                                                                  |
|                                                           | 12. | Parametric test was performed; power calculation results were met; no information about assumption checks             |
|                                                           | 13. | Parallel group randomized controlled trial                                                                            |

Table S3.2 Methodological quality assessment of the included quasi-experimental trials and single-arm intervention trials.

| <b>Autor (Jahr)</b>      | <b>Item</b> | <b>Bewertung</b>                                                                                      |
|--------------------------|-------------|-------------------------------------------------------------------------------------------------------|
| Bogg et al. (2015)       | 1.          | Cause: Exercise intervention; Effect on: CRF                                                          |
|                          | 2.          | No CG; comparison between prepubertal children and adolescents                                        |
|                          | 3.          | No CG                                                                                                 |
|                          | 4.          | No CG                                                                                                 |
|                          | 5.          | Pre- and post-Tx measurement; intervention began one week prior to Tx (no pretest)                    |
|                          | 6.          | Complete follow-up; reasons for missing data are given                                                |
|                          | 7.          | No CG                                                                                                 |
|                          | 8.          | Incomplete information about reliability of measurements                                              |
|                          | 9.          | Parametric tests was performed; no information about power calculation or assumption checks           |
| Däggelmann et al. (2017) | 1.          | Cause: Rehabilitation program; Effect on: CRF                                                         |
|                          | 2.          | IG: cancer children; CG: healthy siblings                                                             |
|                          | 3.          | No cancer treatment for healthy siblings; mediation for cancer children                               |
|                          | 4.          | Healthy siblings                                                                                      |
|                          | 5.          | Measurements before and after the intervention and at follow-up                                       |
|                          | 6.          | Incomplete follow-up; reasons for dropouts are given; no information about dropouts in specific group |
|                          | 7.          | Same outcome measures in groups                                                                       |
|                          | 8.          | Reliability of measurements is given                                                                  |
|                          | 9.          | Non-parametric tests were performed; no information about power calculations                          |
| Diorio et al. (2015)     | 1.          | Cause: Individualized yoga; Effect on: CRF                                                            |
|                          | 2.          | No CG                                                                                                 |
|                          | 3.          | No CG; different treatments for patients                                                              |
|                          | 4.          | No CG                                                                                                 |
|                          | 5.          | Measurements at baseline, at day 7, 14 and 21                                                         |
|                          | 6.          | Incomplete follow-up; reasons for dropouts are given; no information about missing data               |
|                          | 7.          | No CG                                                                                                 |
|                          | 8.          | Reliability of measurements is given                                                                  |
|                          | 9.          | No interferencial statistics were performed                                                           |
| Hooke et al. (2016)      | 1.          | Cause: FitBit intervention; Effect on: CRF                                                            |
|                          | 2.          | No CG                                                                                                 |
|                          | 3.          | No CG; Chemotherapy                                                                                   |
|                          | 4.          | No CG                                                                                                 |
|                          | 5.          | Measurments before, during and after the intervention                                                 |
|                          | 6.          | Incomplete follow-up; reasons for dropouts are given; no information about missing data               |
|                          | 7.          | No CG                                                                                                 |
|                          | 8.          | Reliability of measurements is given                                                                  |
|                          | 9.          | Nonparametric tests were performed; no information about power calculation                            |

|                             |                                                                                                                                                                                                                                                                                                                                                                                                                                                                                                                                                                                         |
|-----------------------------|-----------------------------------------------------------------------------------------------------------------------------------------------------------------------------------------------------------------------------------------------------------------------------------------------------------------------------------------------------------------------------------------------------------------------------------------------------------------------------------------------------------------------------------------------------------------------------------------|
| Hooke et al. (2019)         | <ol style="list-style-type: none"> <li>1. Cause: Education and Coaching (PA); Effect on: CRF</li> <li>2. Comparable characteristics</li> <li>3. No information about treatment of historical CG</li> <li>4. Historical CG</li> <li>5. No pretest; measurements in month 2, 4 and 6</li> <li>6. Incomplete follow-up; no information about dropouts</li> <li>7. Different measurement timepoints</li> <li>8. Reliability of measurements is given</li> <li>9. Parametric tests were performed; no information about power calculation or assumption checks</li> </ol>                    |
| Keats und Culos-Reed (2008) | <ol style="list-style-type: none"> <li>1. Cause: PA intervention; Effect on: CRF</li> <li>2. No CG</li> <li>3. No CG; Chemotherapy, Radiation, Both, Both + BMT</li> <li>4. No CG</li> <li>5. Measurements at baseline, after 8 and 16 weeks, 3-months postintervention,</li> <li>6. 1-year poststudy initiation</li> <li>7. Complete follow-up; reasons for missing data are given</li> <li>8. No CG</li> <li>9. Incomplete information about reliability of measurements<br/>Parametric tests were performed; no information about power calculation and assumption checks</li> </ol> |
| Khoirunnisa et al. (2019)   | <ol style="list-style-type: none"> <li>1. Cause: AeRop exercise intervention; Effect on: CRF</li> <li>2. No significant differences between group characteristics</li> <li>3. Comparable treatments</li> <li>4. Standard care</li> <li>5. Measurements at day 1 and day 5 after the intervention</li> <li>6. No information about follow-up and dropouts</li> <li>7. Same outcome measures in groups</li> <li>8. Reliability of measurements is given</li> <li>9. Parametric tests were performed; no information about power calculation or assumption checks</li> </ol>               |
| Ovans et al. (2018)         | <ol style="list-style-type: none"> <li>1. Cause: PA intervention; Effect on: CRF</li> <li>2. No CG</li> <li>3. No CG; sample included a variety of diagnoses, ages, cancer treatment regimens, and levels of comorbidities</li> <li>4. No CG</li> <li>5. Measurements at baseline, 12 and 24 weeks after the intervention</li> <li>6. Incomplete follow-up; reasons for dropouts are given</li> <li>7. No CG</li> <li>8. Reliability of measurements is given</li> <li>9. Parametric and nonparametric tests were performed; no information about power calculation</li> </ol>          |
| Platschek et al. (2017)     | <ol style="list-style-type: none"> <li>1. Cause: Computerbased exercise intervention; Effect on: CRF</li> <li>2. No CG</li> <li>3. No CG; chemotherapy</li> <li>4. No CG</li> <li>5. Measurements at baseline, 4, 8 and 12 weeks after the intervention</li> </ol>                                                                                                                                                                                                                                                                                                                      |

|                          |    |                                                                                                      |
|--------------------------|----|------------------------------------------------------------------------------------------------------|
|                          | 6. | Complete follow-up; reasons for dropouts/missing data are given                                      |
|                          | 7. | No CG                                                                                                |
|                          | 8. | Reliability of measurements is given                                                                 |
|                          | 9. | Parametric and nonparametric tests were performed; no information if assumption checks are respected |
| Rosenhagen et al. (2011) | 1. | Cause: Exercise intervention; Effect on: CRF                                                         |
|                          | 2. | CG: post-SCT (after care); IG: active treatment                                                      |
|                          | 3. | breathing therapy, massage, mobilization therapy                                                     |
|                          | 4. | Retrospective CG                                                                                     |
|                          | 5. | Measurements at day 1 and 14, at discharge                                                           |
|                          | 6. | Incomplete follow-up; reasons for dropouts are given; missing information about dropouts             |
|                          | 7. | Same outcome measures in groups                                                                      |
|                          | 8. | Reliability of measurements is given                                                                 |
|                          | 9. | No information about statistical procedure                                                           |
| Spreafico et al. (2021)  | 1. | Cause: Exercise intervention; Effect on: CRF                                                         |
|                          | 2. | Significant differences between group characteristics                                                |
|                          | 3. | Comparable treatments                                                                                |
|                          | 4. | Standard care                                                                                        |
|                          | 5. | IG: measurement after intervention; CG: measurement at baseline                                      |
|                          | 6. | No follow-up                                                                                         |
|                          | 7. | Different measurement timepoints                                                                     |
|                          | 8. | Reliability of measurements is given                                                                 |
|                          | 9. | Parametric and nonparametric tests were performed; no information about power calculation            |
| Su et al. (2018)         | 1. | Cause: Walking intervention and education; Effect on: CRF                                            |
|                          | 2. | No CG                                                                                                |
|                          | 3. | No CG; Active or completed treatment                                                                 |
|                          | 4. | No CG                                                                                                |
|                          | 5. | Measurement before, during and after the intervention                                                |
|                          | 6. | Complete follow-up; reasons for dropouts/missing data are given                                      |
|                          | 7. | No CG                                                                                                |
|                          | 8. | Incomplete information about reliability of measurements                                             |
|                          | 9. | Parametric tests were performed; no information about power calculation and assumption checks        |
| Yeh et al. (2011)        | 1. | Cause: Home-based aerobic exercise intervention; Effect on: CRF                                      |
|                          | 2. | Comparable characteristics                                                                           |
|                          | 3. | Comparable treatment                                                                                 |
|                          | 4. | Standard care                                                                                        |
|                          | 5. | Measurement before, during and after the intervention; follow-up after 1 month                       |
|                          | 6. | Incomplete follow-up; reasons for dropouts/missing data are given                                    |
|                          | 7. | Same outcome measures in groups                                                                      |
|                          | 8. | Incomplete information about reliability of measurements                                             |
|                          | 9. | Mixed-effects model was performed; no information about power calculation or assumption checks       |
