# Supplementary material for: Physical Activity as a Treatment for Cancer-Related Fatigue in Children, Adolescents and Young Adults: A Systematic Review
Source: MDPI journal article supplement (doi:10.3390/children10030572), 2023-03-17
Supplement: s1 [file s1]

## S2: JBI Critical Appraisal Checklist

Table S2.1 JBI Critical Appraisal Checklist for Randomized Controlled Trials (Tufanaru et al., 2020).

| Item                                                                                                                                                                                            | Yes                      | No                       | Unclear                  | NA                       |
|-------------------------------------------------------------------------------------------------------------------------------------------------------------------------------------------------|--------------------------|--------------------------|--------------------------|--------------------------|
| <b>1</b> Was true randomization used for assignment of participants to treatment groups?                                                                                                        | <input type="checkbox"/> | <input type="checkbox"/> | <input type="checkbox"/> | <input type="checkbox"/> |
| <b>2</b> Was allocation to treatment groups concealed?                                                                                                                                          | <input type="checkbox"/> | <input type="checkbox"/> | <input type="checkbox"/> | <input type="checkbox"/> |
| <b>3</b> Were treatment groups similar at the baseline?                                                                                                                                         | <input type="checkbox"/> | <input type="checkbox"/> | <input type="checkbox"/> | <input type="checkbox"/> |
| <b>4</b> Were participants blind to treatment assignment?                                                                                                                                       | <input type="checkbox"/> | <input type="checkbox"/> | <input type="checkbox"/> | <input type="checkbox"/> |
| <b>5</b> Were those delivering treatment blind to treatment assignment?                                                                                                                         | <input type="checkbox"/> | <input type="checkbox"/> | <input type="checkbox"/> | <input type="checkbox"/> |
| <b>6</b> Were outcomes assessors blind to treatment assignment?                                                                                                                                 | <input type="checkbox"/> | <input type="checkbox"/> | <input type="checkbox"/> | <input type="checkbox"/> |
| <b>7</b> Were treatment groups treated identically other than the intervention of interest?                                                                                                     | <input type="checkbox"/> | <input type="checkbox"/> | <input type="checkbox"/> | <input type="checkbox"/> |
| <b>8</b> Was follow up complete and if not, were differences between groups in terms of their follow up adequately described and analyzed?                                                      | <input type="checkbox"/> | <input type="checkbox"/> | <input type="checkbox"/> | <input type="checkbox"/> |
| <b>9</b> Were participants analyzed in the groups to which they were randomized?                                                                                                                | <input type="checkbox"/> | <input type="checkbox"/> | <input type="checkbox"/> | <input type="checkbox"/> |
| <b>10</b> Were outcomes measured in the same way for treatment groups?                                                                                                                          | <input type="checkbox"/> | <input type="checkbox"/> | <input type="checkbox"/> | <input type="checkbox"/> |
| <b>11</b> Were outcomes measured in a reliable way?                                                                                                                                             | <input type="checkbox"/> | <input type="checkbox"/> | <input type="checkbox"/> | <input type="checkbox"/> |
| <b>12</b> Was appropriate statistical analysis used?                                                                                                                                            | <input type="checkbox"/> | <input type="checkbox"/> | <input type="checkbox"/> | <input type="checkbox"/> |
| <b>13</b> Was the trial design appropriate, and any deviations from the standard RCT design (individual randomization, parallel groups) accounted for in the conduct and analysis of the trial? | <input type="checkbox"/> | <input type="checkbox"/> | <input type="checkbox"/> | <input type="checkbox"/> |

NA: Not applicable.

Table S2.2 JBI Critical Appraisal Checklist for Quasi-Experimental Studies (Tufanaru et al., 2020).

| Item |                                                                                                                                          | Yes                      | No                       | Unclear                  | NA                       |
|------|------------------------------------------------------------------------------------------------------------------------------------------|--------------------------|--------------------------|--------------------------|--------------------------|
| 1    | Is it clear in the study what is the 'cause' and what is the 'effect' (i.e. there is no confusion about which variable comes first)?     | <input type="checkbox"/> | <input type="checkbox"/> | <input type="checkbox"/> | <input type="checkbox"/> |
| 2    | Were the participants included in any comparisons similar?                                                                               | <input type="checkbox"/> | <input type="checkbox"/> | <input type="checkbox"/> | <input type="checkbox"/> |
| 3    | Were the participants included in any comparisons receiving similar treatment/care, other than the exposure or intervention of interest? | <input type="checkbox"/> | <input type="checkbox"/> | <input type="checkbox"/> | <input type="checkbox"/> |
| 4    | Was there a control group?                                                                                                               | <input type="checkbox"/> | <input type="checkbox"/> | <input type="checkbox"/> | <input type="checkbox"/> |
| 5    | Were there multiple measurements of the outcome both pre and post the intervention/exposure?                                             | <input type="checkbox"/> | <input type="checkbox"/> | <input type="checkbox"/> | <input type="checkbox"/> |
| 6    | Was follow up complete and if not, were differences between groups in terms of their follow up adequately described and analyzed?        | <input type="checkbox"/> | <input type="checkbox"/> | <input type="checkbox"/> | <input type="checkbox"/> |
| 7    | Were the outcomes of participants included in any comparisons measured in the same way?                                                  | <input type="checkbox"/> | <input type="checkbox"/> | <input type="checkbox"/> | <input type="checkbox"/> |
| 8    | Were outcomes measured in a reliable way?                                                                                                | <input type="checkbox"/> | <input type="checkbox"/> | <input type="checkbox"/> | <input type="checkbox"/> |
| 9    | Was appropriate statistical analysis used?                                                                                               | <input type="checkbox"/> | <input type="checkbox"/> | <input type="checkbox"/> | <input type="checkbox"/> |

NA: Not applicable.
