# Supplementary material for: Physical Activity as a Treatment for Cancer-Related Fatigue in Children, Adolescents and Young Adults: A Systematic Review
Source: MDPI journal article supplement (doi:10.3390/children10030572), 2023-03-17
Supplement: s1 [file s1]

S4: Deviations from indications given in PROSPERO

| PROSPERO items                         | Deviation (Yes / No) | Description of deviation                                                                       | Comments                                                                                                                                                                                                                                                                                                |
|----------------------------------------|----------------------|------------------------------------------------------------------------------------------------|---------------------------------------------------------------------------------------------------------------------------------------------------------------------------------------------------------------------------------------------------------------------------------------------------------|
| Review title                           | Yes                  | The title in PROSPERO was a working title, which corresponds in content to the current title.  |                                                                                                                                                                                                                                                                                                         |
| Authors                                | No                   |                                                                                                |                                                                                                                                                                                                                                                                                                         |
| Citation                               | Yes                  | According to the change in the title the citation will slightly differ.                        |                                                                                                                                                                                                                                                                                                         |
| Review question                        | No                   |                                                                                                |                                                                                                                                                                                                                                                                                                         |
| Searches                               | No                   |                                                                                                | The search strategy was developed using terms and MeshTerms that combined the population ("oncology OR child oncology OR adolescent oncology"), the interventions ("exercise OR sport") and the outcome of interest ("fatigue").                                                                        |
| Types of study to be included          | No                   |                                                                                                |                                                                                                                                                                                                                                                                                                         |
| Condition or domain being studied      | No                   |                                                                                                |                                                                                                                                                                                                                                                                                                         |
| Participants/population                | Yes                  | At least 75% of the subjects were children, adolescents or young adults under 21 years of age. | To avoid the exclusion of studies reporting mainly on children, but also on a few young adult patients, it was necessary adapt the population (inclusion criteria) to a study population in which at least 75 percent of the subjects were children, adolescents or young adults under 21 years of age. |
| Intervention(s), exposure(s)           | No                   |                                                                                                | Physical activity interventions included any type of intervention in which skeletal muscles produced any bodily movement                                                                                                                                                                                |
| Comparator(s)/control                  | No                   |                                                                                                |                                                                                                                                                                                                                                                                                                         |
| Main outcome(s)                        | No                   |                                                                                                |                                                                                                                                                                                                                                                                                                         |
| Additional outcome(s)                  | No                   |                                                                                                |                                                                                                                                                                                                                                                                                                         |
| Data extraction (selection and coding) | No                   |                                                                                                | Described in a more detailed way in the manuscript.                                                                                                                                                                                                                                                     |

|                                                                 |     |                                                                                                                                                                                                                               |                                                                                         |
|-----------------------------------------------------------------|-----|-------------------------------------------------------------------------------------------------------------------------------------------------------------------------------------------------------------------------------|-----------------------------------------------------------------------------------------|
| <b>Risk of bias (quality) assessment</b>                        | No  |                                                                                                                                                                                                                               | Described in a more detailed way in the manuscript.                                     |
| <b>Strategy for data synthesis</b>                              | Yes | No meta-analysis was conducted.                                                                                                                                                                                               | Since included studies have shown a large heterogeneity no meta-analysis was conducted. |
| <b>Analysis of subgroups or subsets</b>                         | Yes | Solely the impact of different physical activity interventions on CRF was investigated. No further analysis regarding the various impact of these interventions on populations with different cancer diagnosis was performed. |                                                                                         |
| <b>Contact details for further information</b>                  | No  |                                                                                                                                                                                                                               |                                                                                         |
| <b>Organisation affiliation of the review</b>                   | No  |                                                                                                                                                                                                                               |                                                                                         |
| <b>Review team members and their organisational affiliation</b> | No  |                                                                                                                                                                                                                               |                                                                                         |
| <b>Type and method of review</b>                                | Yes | No conduction of a meta-analysis                                                                                                                                                                                              |                                                                                         |
| <b>Funding sources/sponsors</b>                                 | Yes | The project has also received funding from the Kinderkrebshilfe Mainz e.V. (next to the funding from the European Union's Horizon Project).                                                                                   |                                                                                         |
| <b>Conflicts of interest</b>                                    | Yes | No conflicts of interest.                                                                                                                                                                                                     | Nothing is currently stated in PROSPERO.                                                |
| <b>Language</b>                                                 | Yes | The review will solely be published in English (and not also in German language).                                                                                                                                             |                                                                                         |
