# Supplementary material for: Physical Activity as a Treatment for Cancer-Related Fatigue in Children, Adolescents and Young Adults: A Systematic Review
Source: Children (Basel). 2023 Mar 17;10(3):572. doi: 10.3390/children10030572 (PMC10047895; doi:10.3390/children10030572)
Supplement: Supplementary file 1 [file children-10-00572-s001.zip]

Archive with 5 entries (5 files):
- S1_Search strategy.pdf
- S2_JBI Critical Appraisal Checklist.pdf
- S3_Methodological quality assessment of the included studies.pdf
- S4_PRISMA checklist.pdf
- S5_Deviations from PROSPERO.pdf
